# Supplementary material for: Enhanced mRNA and pDNA delivery via PEGylated solid lipid nanoparticles with an optimally balanced ionizable/cationic lipid content
Source: Royal Society of Chemistry journal article supplement (doi:10.1039/d5tb00470e), 2025-01-01
Supplement: d5tb00470e1.pdf [file d5tb00470e1.pdf]

## Supplementary Information

# Enhanced mRNA and pDNA Delivery via PEGylated Solid Lipid Nanoparticles with an Optimally Balanced Ionizable/Cationic Lipid Content

Nipuni Maniyamgama<sup>ab</sup>, Ki Hyun Bae<sup>a</sup>, Jialing Lee<sup>a</sup>, James Hoi Po Hui<sup>b</sup> and Yi Yan Yang<sup>ab\*</sup>

<sup>a</sup>Bioprocessing Technology Institute (BTI), Agency for Science, Technology and Research (A\*STAR), 20 Biopolis Way, Centros #06-01, Singapore 138668, Republic of Singapore

<sup>b</sup>Department of Orthopaedic Surgery, Yong Loo Lin School of Medicine, National University of Singapore, 21 Lower Kent Ridge Road, Singapore 119077, Republic of Singapore

\*Corresponding author: Yi Yan Yang (yyyang@bti.a-star.edu.sg)

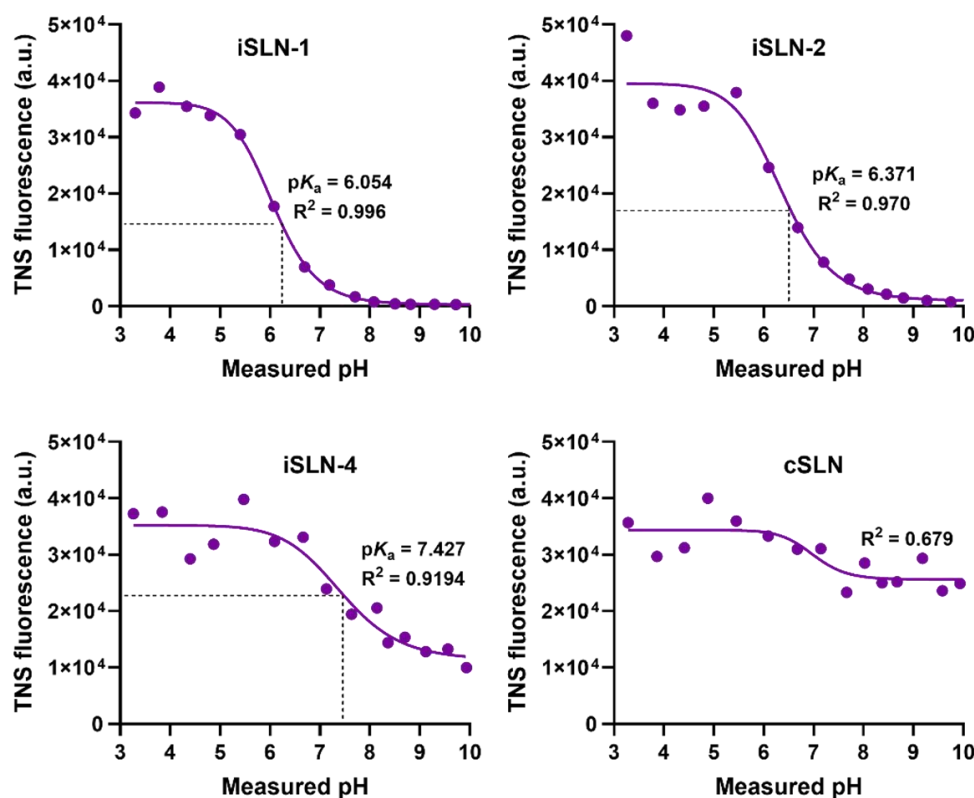

Fig. S1 Representative TNS fluorescence titration curves of iSLN-1, iSLN-2, iSLN-4 and cSLN.

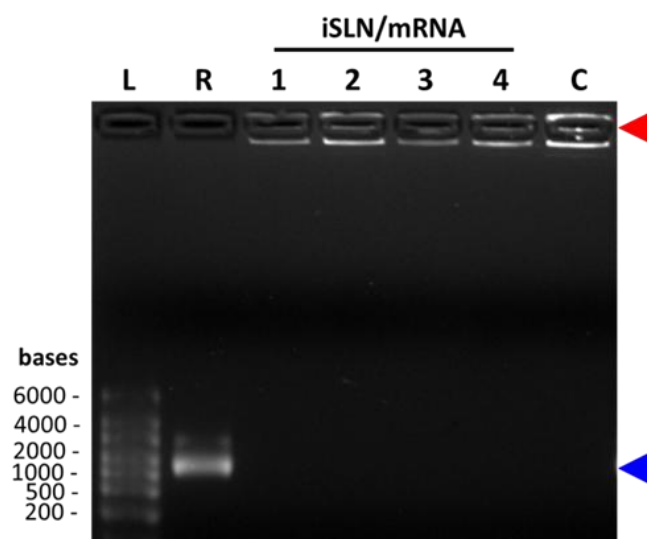

**Fig. S2** Gel electrophoresis analysis of iSLN/mRNA and cSLN/mRNA complexes at an N/P ratio of 6. L: ladder (RiboRuler high-range RNA ladder), R: free mRNA, 1-4: iSLN-1/mRNA to iSLN-4/mRNA complexes, C: cSLN/mRNA complexes. Blue and red arrowheads mark the locations of free mRNA and its corresponding complexes, respectively.

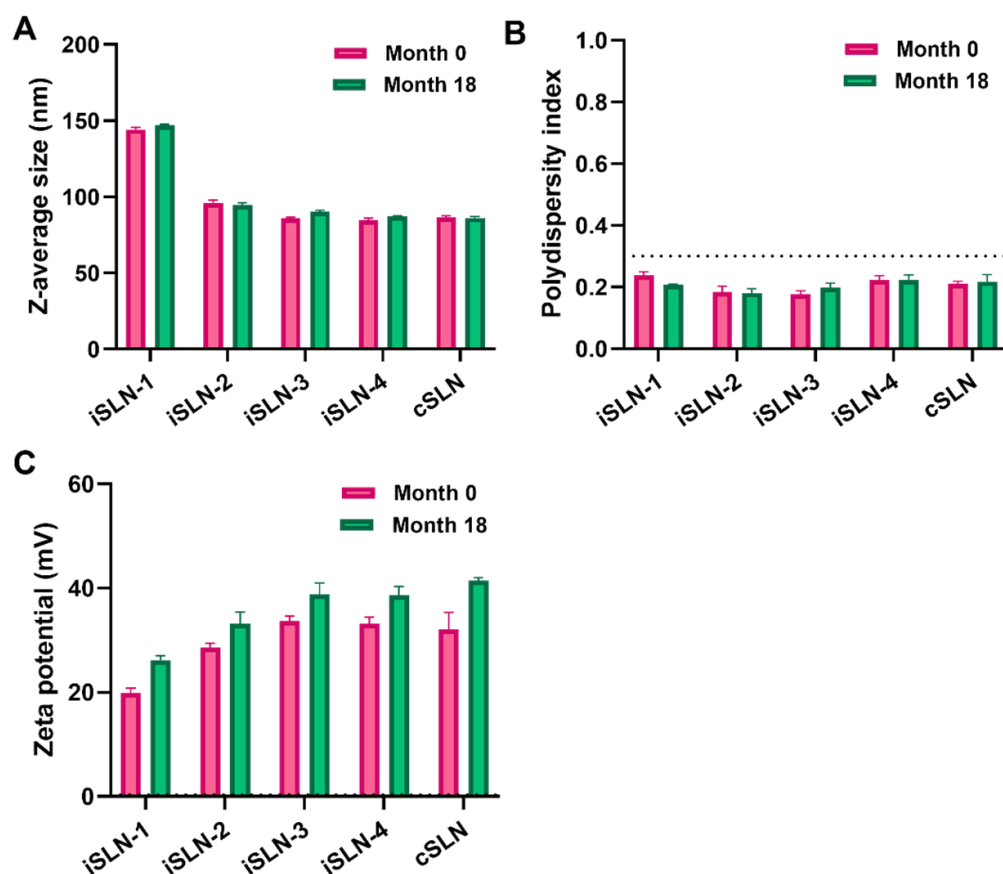

Fig. S3 (A) Z-average size, (B) polydispersity index and (C) zeta potential of bare iSLNs and cSLN measured before and after storage at 4 °C for 18 months. Mean  $\pm$  SD ( $n = 3$ ).

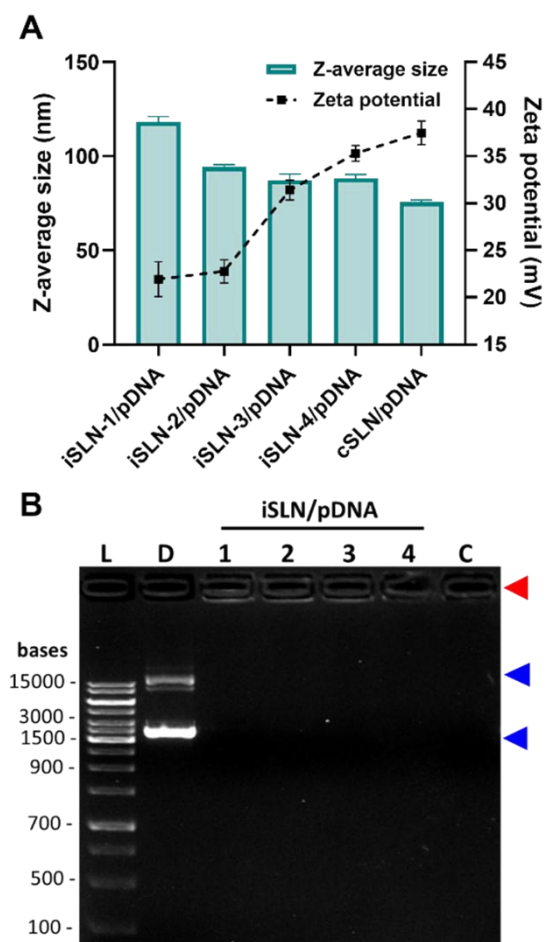

**Fig. S4** (A) Z-average size and zeta potential of iSLN/pDNA and cSLN/pDNA complexes. Mean  $\pm$  SD ( $n = 3$ ). (B) Gel electrophoresis analysis of iSLN/pDNA and cSLN/pDNA complexes formulated with FLuc pDNA at an N/P ratio of 12. L: ladder (1 kb Plus DNA ladder), D: free pDNA, 1-4: iSLN-1/pDNA to iSLN-4/pDNA complexes, C: cSLN/pDNA complexes. The blue and red arrowheads indicate the location of free pDNA and its corresponding complexes, respectively.

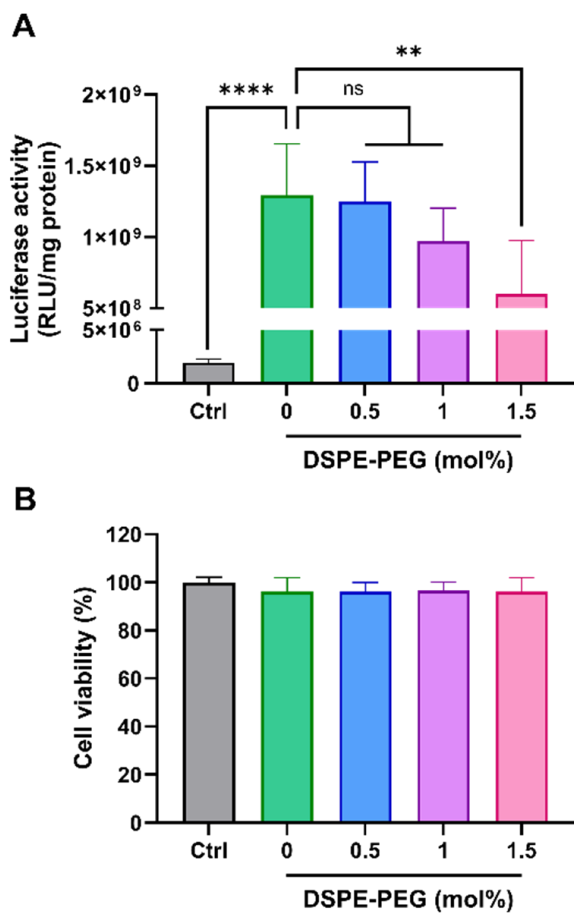

**Fig. S5** (A) Luciferase expression levels and (B) viability of HEK293T cells treated for 48 h with PEG-iSLN-3/pDNA complexes with various DSPE-PEG contents (0, 0.5, 1 and 1.5 mol% of total lipid). The complexes were formulated with FLuc pDNA at an N/P ratio of 12. Mean  $\pm$  SD ( $n = 6$ ); \*\* $P < 0.01$ ; \*\*\*\* $P < 0.0001$ ; ns: nonsignificant.

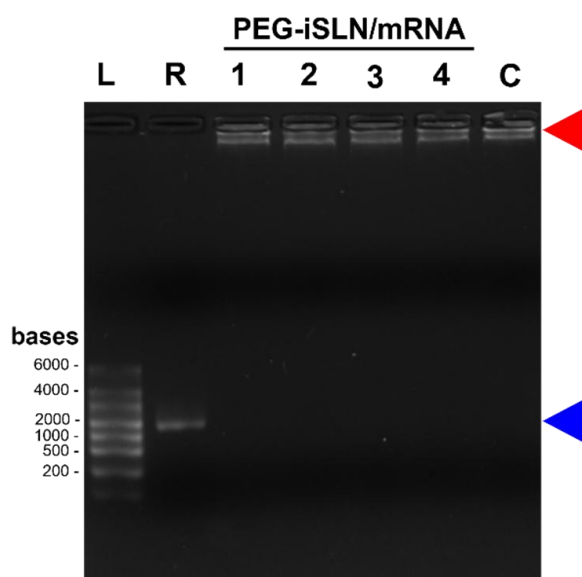

**Fig. S6** Gel electrophoresis analysis of PEG-iSLN/mRNA and PEG-cSLN/mRNA complexes formulated with FLuc mRNA at an N/P ratio of 6. L: ladder (RiboRuler high-range RNA ladder), R: free mRNA, 1-4: PEG-iSLN-1/mRNA to PEG-iSLN-4/mRNA complexes, C: PEG-cSLN/mRNA complex. The blue and red arrowheads indicate the location of free mRNA and its corresponding complexes, respectively.

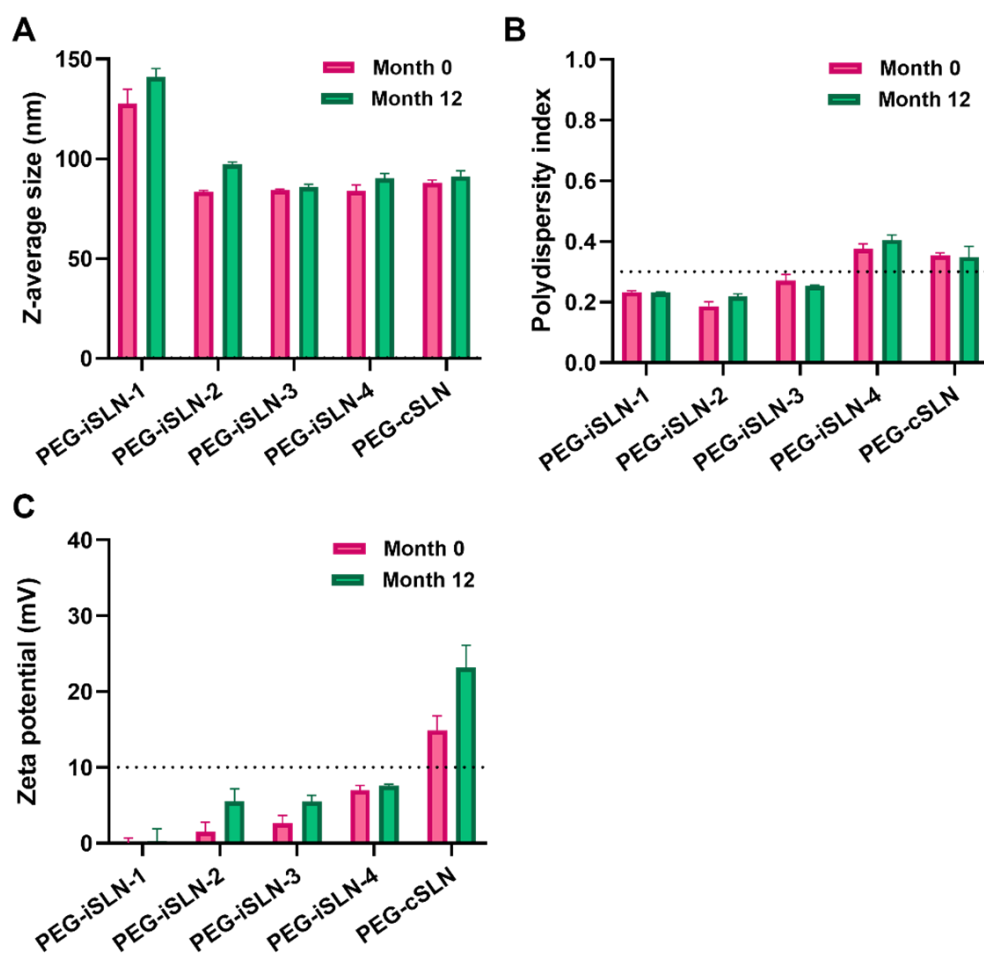

Fig. S7 (A) Z-average size (B) polydispersity index and (C) zeta potential of bare PEG-iSLNs and PEG-cSLN measured before and after storage at 4 °C for 12 months. Mean  $\pm$  SD ( $n = 3$ ).

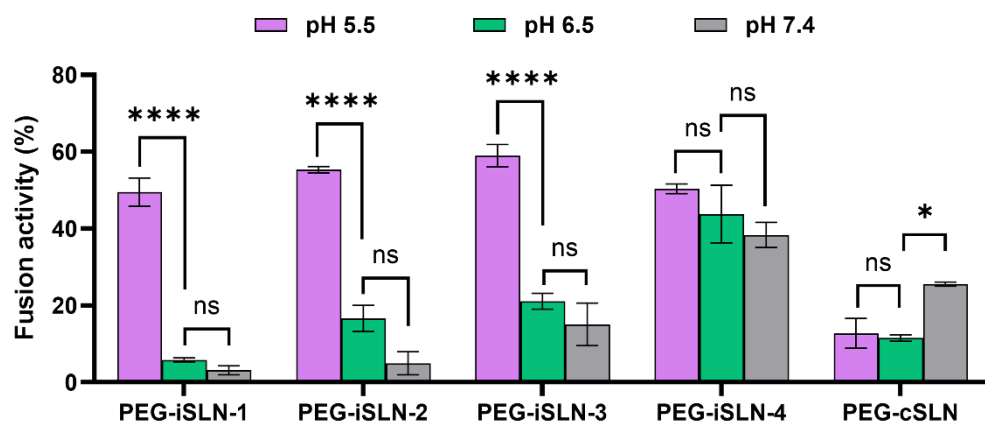

Fig. S8 Membrane fusion activity of bare PEG-iSLN or PEG-cSLN formulations measured at pH 5.5, 6.5 or 7.4. Mean  $\pm$  SD ( $n = 2$ ); \*\*\*\* $P < 0.0001$ ; \* $P < 0.05$ ; ns: nonsignificant.



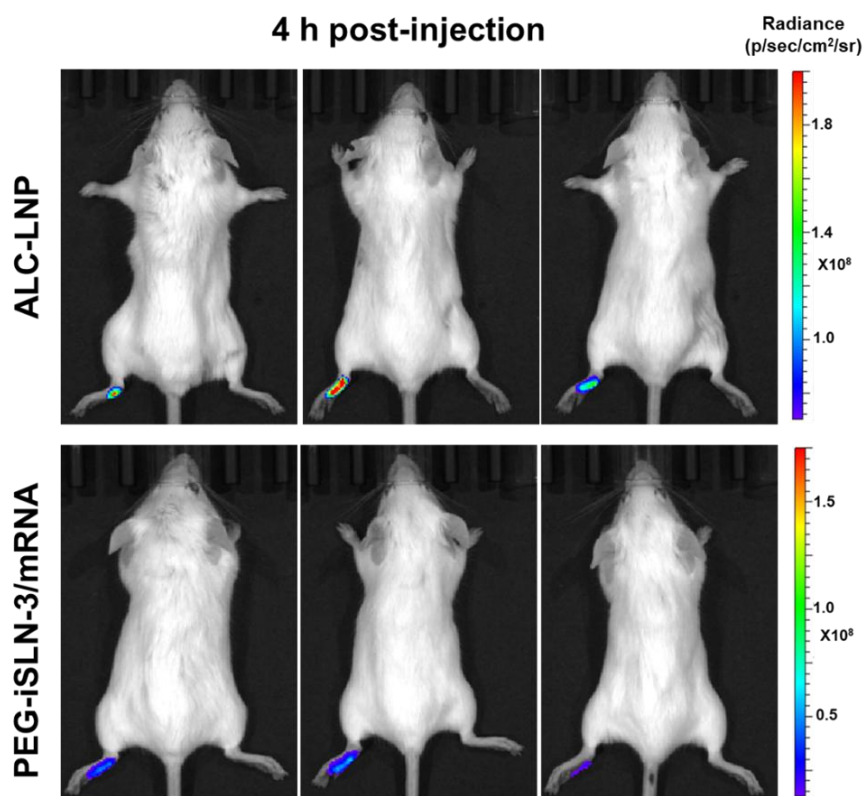

**Fig. S9** Whole-body bioluminescence images of BALB/c mice taken at 4 h after footpad subcutaneous injection of ALC-LNP or PEG-iSLN-3/mRNA complexes at the same dose (1  $\mu$ g of FLuc mRNA/mouse).

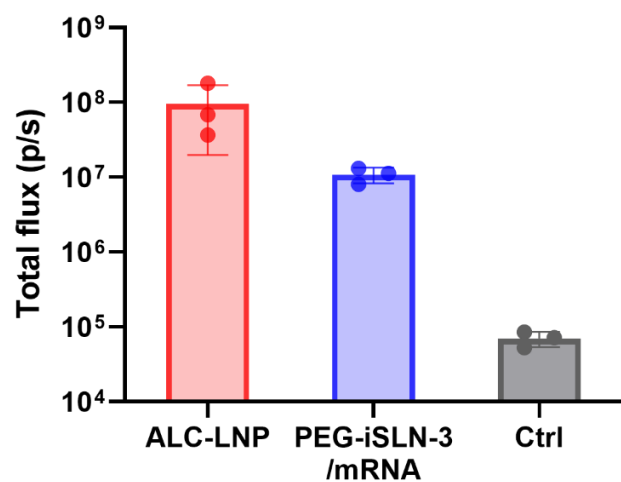

**Fig. S10** Total flux values of the hind leg muscle (injection site) of BALB/c mice following the intramuscular administration of ALC-LNP or PEG-iSLN-3/mRNA complexes (1  $\mu$ g of FLuc mRNA/mouse). Naive mice that received only luciferin solution were used as a mock control (Ctrl). Mean  $\pm$  SD ( $n = 3$ ).
